# Supplementary material
Source: HighWire-hosted journal article supplement (https://bmjopengastro.bmj.com/content/6/1/e000255)
Supplement: inline-supplementary-material-1 [file inline-supplementary-material-1.docx]

**Supplementary Data Content - Table 1**

MEDLINE Search Strategy – OVID MEDLINE In process & other non-indexed citations and OVID MEDLINE.

| **Search** | **Query** |
| --- | --- |
| #1 | exp inflammatory bowel diseases/ |
| #2 | inflammatory bowel disease*.mp. |
| #3 | exp Colitis, Ulcerative/ |
| #4 | ulcerative colitis.mp. |
| #5 | exp Crohn disease/ |
| #6 | Crohn* disease.mp. |
| #7 | Crohn*.mp. |
| #8 | IBD.mp. |
| #9 | CD.mp. |
| #10 | UC.mp. |
| #11 | 1 OR 2 OR 3 OR 4 OR 5 OR 6 OR 7 OR 8 OR 9 OR 10 |
| #12 | exp body image/ |
| #13 | body image.mp. |
| #14 | body dissatisfaction.mp. |
| #15 | body awareness.mp. |
| #16 | body concern*.mp. |
| #17 | body attitude*.mp. |
| #18 | body preoccupation.mp. |
| #19 | body perception.mp. |
| #20 | body anxiety.mp. |
| #21 | body conscious*.mp. |
| #22 | 12 OR 13 OR 14 OR 15 OR 16 OR 17 OR 18 OR 19 OR 20 OR 21 |
| #23 | 11 AND 22 |
